# Supplementary material
Source: PubMed Central journal article supplement (PMC5576272)
Supplement: Supp_Fig1.pdf [file Supp_Fig1.pdf]

## Supplementary Data

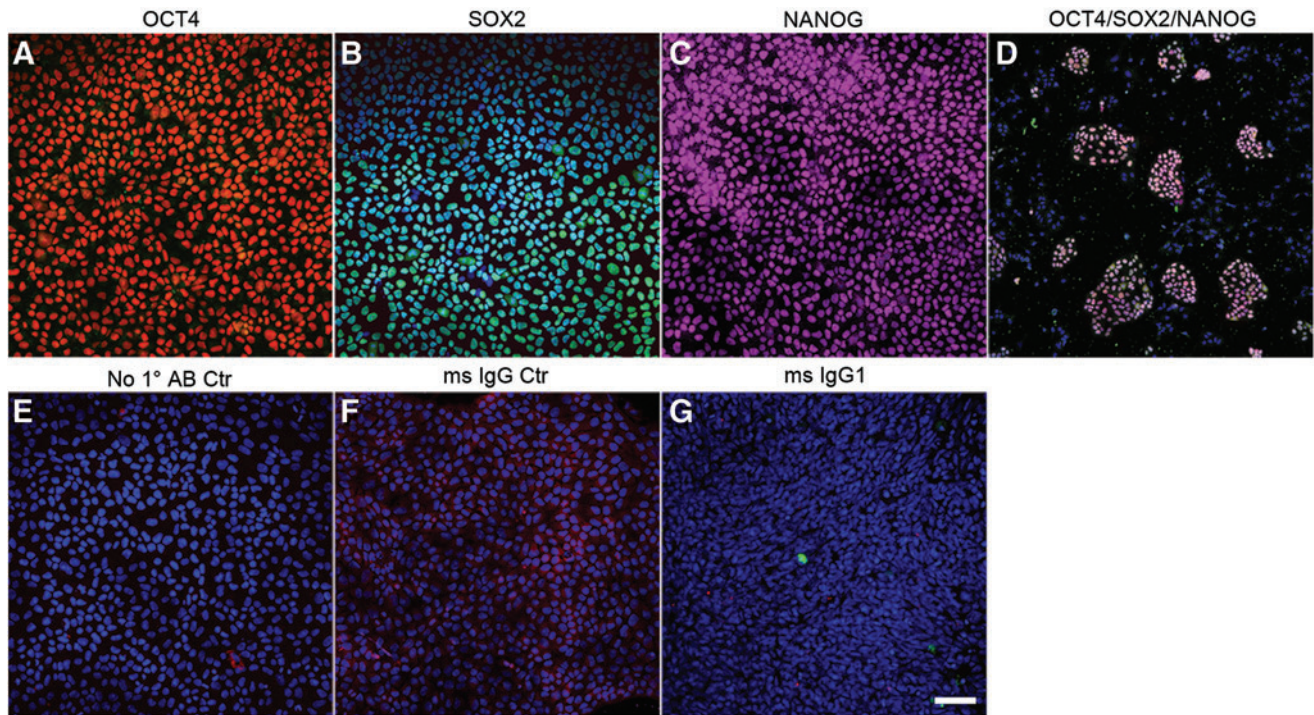

**SUPPLEMENTARY FIG. S1.** Individual immunocytochemical analysis of (A) OCT4, (B) SOX2 (with DAPI), and (C) NANOG shows channel specificity and nuclear localization. (D) Triple immunofluorescence with DAPI in nonpurified culture shows specificity to undifferentiated stem cell colonies (OCT4, *red*; SOX2, *green*; NANOG, *fuchsia*). (E) Negative controls consisting of no primary antibody, and isotype controls (F, ms IgG; G, ms IgG1) present no false-positive immunofluorescence. Scale bars: (A–C and E–G), 50  $\mu\text{m}$ ; D, 100  $\mu\text{m}$ .
