# Supplementary material
Source: PubMed Central journal article supplement (PMC5576272)
Supplement: Supp_Fig2.pdf [file Supp_Fig2.pdf]

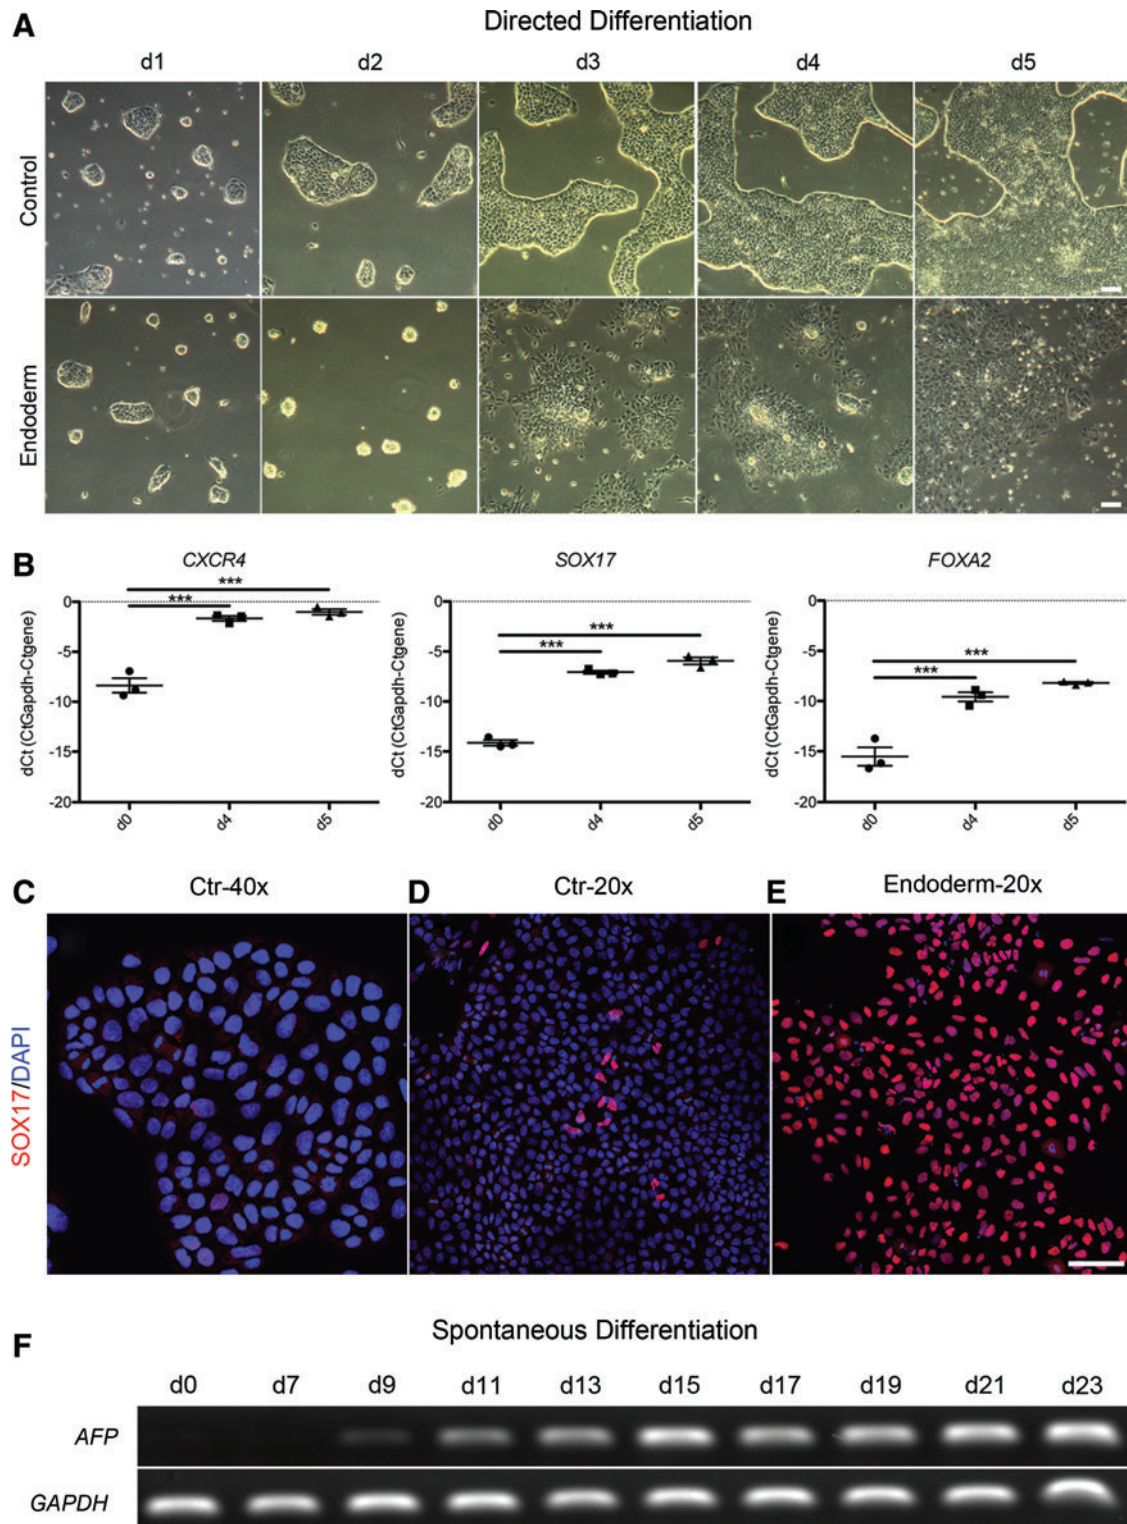

**SUPPLEMENTARY FIG. S2.** (A) Brightfield images showing Cj-iPSCs from d1 to d5 of control and directed endoderm differentiation conditions. (B) Cj-iPSC differentiation to definitive endoderm resulted in significant upregulation of *CXCR4*, *SOX17*, and *FOXA2* after d4 and d5 compared to undifferentiated Cj-iPSCs ( $***P < 0.001$ ). There was no significant difference between d4 and d5 for any of the three genes. (C) ICC of SOX17 in control undifferentiated Cj-iPSC colonies was largely negative although some positively labeled cells (D) were observed. (E) SOX17 expression was observed in nearly every cell after 5 days of directed endoderm differentiation. (F) Cj-iPSCs allowed to spontaneously differentiate were first observed to express AFP after 9 days. GAPDH was used as a reference gene. Scale bars: (A, D, E) 100  $\mu\text{m}$ ; (C), 50  $\mu\text{m}$ .
