# Supplementary material
Source: PubMed Central journal article supplement (PMC5576272)
Supplement: Supp_Table1.pdf [file Supp_Table1.pdf]

SUPPLEMENTARY TABLE S1. PRIMER PAIRS FOR REVERSE TRANSCRIPTION-POLYMERASE CHAIN REACTION AND QUANTITATIVE REVERSE TRANSCRIPTION-POLYMERASE CHAIN REACTION

| <i>Pluripotent genes</i>            |     |                        | <i>Neural differentiation genes</i>    |     |                        |
|-------------------------------------|-----|------------------------|----------------------------------------|-----|------------------------|
| OCT4                                | FWD | CGAGAAGGATGTGGTCCGTG   | OTX2                                   | FWD | CTGTTTGCCAAGACCCGGTA   |
|                                     | REV | ACACTGGTCCCCCTGAGAAA   |                                        | REV | AAACCATACCTGCACCCTGG   |
| SOX2                                | FWD | GCGGAAAACCAAGACGCTCA   | PAX6                                   | FWD | GTAGAACGCGGCTGTCAGA    |
|                                     | REV | GTTCATGTGCGGTAGCTGT    |                                        | REV | AATCTCAGATTCTGGGAGCG   |
| NANOG                               | FWD | GATGTGACTCAGAAGGCCTCA  | PROM1                                  | FWD | CCCCGAAGCCGGATCATAAA   |
|                                     | REV | CCATACCGGAAGGTTCCCAG   |                                        | REV | CAAGGCACCATCCCCTGTGA   |
| KLF4                                | FWD | GCTCCCATCTTTCTCCACGTT  | HES5                                   | FWD | ATTCCTCTGTGTGGGTGGGT   |
|                                     | REV | GCCAGCGGTTATTTGGAGCA   |                                        | REV | AGGGGGCTGAACAGTCAGAT   |
| LIN28                               | FWD | TGACAGATTCAGGCCCTT     | DCX                                    | FWD | AAAGGCATCCCCAACACCTC   |
|                                     | REV | TTCTGAAGAACCCTCCGGGGC  |                                        | REV | TGGAGGTTCCGTTTGCTGAG   |
| CMYC                                | FWD | CAGCGACTCTGAGGAGGAACA  | NESTIN                                 | FWD | TCAGTTCCAGGACCCCAA     |
|                                     | REV | GTGGGCTGTGAGGAGTTTG    |                                        | REV | GGTGTCTCAAGGGTAGCAGG   |
| DNMT3B                              | FWD | GAAAGCCCAGCTTCCCTGAG   | FABP7                                  | FWD | GTGGAGGCTTTCTGTGCTACC  |
|                                     | REV | CGATGGTGAGGTAAGGGCTG   |                                        | REV | AAGCCCACACCTAGAGCCTTC  |
| PODXL                               | FWD | CTAAAGGAGGCAGGGGTCAG   | ZIC1                                   | FWD | CGAGCGACAAGCCATCTT     |
|                                     | REV | CACGAGGAGCAGGAAGGATG   |                                        | REV | GGAGGATTCTGTGGACCTTCA  |
| ZFP42                               | FWD | TACAGTCTAGCAGCAGGTGTTT | NEUROG2                                | FWD | GGCACACACCAAAGCCACA    |
|                                     | REV | TTTCTGGCCCCTTGCTTGT    |                                        | REV | TTCTCTTCAACTCCAAGGT    |
| <i>Neural differentiation genes</i> |     |                        | <i>Endoderm &amp; *reference genes</i> |     |                        |
| MAP2                                | FWD | TGCGCCCAGATTTTATTGATCT | CXCR4                                  | FWD | CTGGCATAGTGGGCAATGGA   |
|                                     | REV | CCTCGGTTAGAGACAACAAGC  |                                        | REV | CAGCCTGTACTTGTCCGTCA   |
| NEUN                                | FWD | TTACGGAGCGGTCTGTATC    | SOX17                                  | FWD | TGCAAAGGCCTTATTGTTGTTT |
|                                     | REV | TGCCGTAACCTGTCGCTGTAG  |                                        | REV | CGCAAACCCTGGGAAAACCT   |
| NEUROD1                             | FWD | CTGTCACCGCTCAGGACCTA   | FOXA2                                  | FWD | ACAGTCACACTGCCAAGAATC  |
|                                     | REV | GTCCAGCTTGGAGGACCTTG   |                                        | REV | GTACCTGGTGTGTCCCATCT   |
| CHAT                                | FWD | TCCAATTGGCCTGCTGACAT   | AFP                                    | FWD | GAGGGAGCGGCTGACATTAT   |
|                                     | REV | CCCGATTGGTGGAGTCTTTCA  |                                        | REV | CATGGCCTCCTGTTGGCATA   |
| GAD1                                | FWD | GATGGTTTTTCGATGGCGAGC  | *GAPDH                                 | FWD | TCGGAGTCAACGGATTTGGT   |
|                                     | REV | GGAGCCACCTTGTGTAGCTT   |                                        | REV | ATGGCGACGACATCCACTTT   |
| GFAP                                | FWD | TGCGGGATGGAGAGGTCATT   | *RPLP0                                 | FWD | TAAGTGGGGGCGTTTATCCG   |
|                                     | REV | AGCCCTTCATTCAATGGGGC   |                                        | REV | AAGACGCTGTCACTTCCACG   |
