# Supplementary material
Source: PubMed Central journal article supplement (PMC5576272)
Supplement: Supp_Table3.pdf [file Supp_Table3.pdf]

SUPPLEMENTARY TABLE S3. COMPLETE RESULTS OF ANALYSIS OF VARIANCE WITH TUKEY'S MULTIPLE COMPARISONS OF QUANTITATIVE REVERSE TRANSCRIPTION-POLYMERASE CHAIN REACTION DATA

| <i>Cj</i> -ESCs | F-statistic     | P-value | D0:D16 | D0:D30 | D0:D42 | D16:D30 | D16:D42 | D30:D42 |
|-----------------|-----------------|---------|--------|--------|--------|---------|---------|---------|
| OCT4            | $F(3,8) = 6.35$ | 0.0165  | Yes    | Yes    | Yes    | No      | No      | No      |
| SOX2            | $F(3,8) = 4.71$ | 0.0353  | No     | No     | Yes    | No      | No      | No      |
| NANOG           | $F(3,8) = 14.3$ | 0.0014  | Yes    | Yes    | Yes    | No      | No      | No      |
| KLF4            | $F(3,8) = 4.69$ | 0.0357  | No     | Yes    | No     | No      | No      | No      |
| LIN28           | $F(3,8) = 2.07$ | 0.1824  | No     | No     | No     | No      | No      | No      |
| CMYC            | $F(3,8) = 15.4$ | 0.0011  | No     | Yes    | Yes    | Yes     | Yes     | No      |
| DMNT3B          | $F(3,8) = 20.4$ | 0.0004  | Yes    | Yes    | Yes    | No      | No      | No      |
| PODXL           | $F(3,8) = 8.59$ | 0.007   | No     | Yes    | Yes    | No      | No      | No      |
| ZFP42           | $F(3,8) = 26.3$ | 0.0002  | Yes    | Yes    | Yes    | Yes     | Yes     | No      |
| PROM1           | $F(3,8) = 8.22$ | 0.008   | No     | No     | Yes    | No      | Yes     | No      |
| DCX             | $F(3,8) = 12.3$ | 0.0023  | Yes    | Yes    | Yes    | No      | No      | No      |
| NESTIN          | $F(3,8) = 3.49$ | 0.07    | No     | No     | No     | No      | No      | No      |
| OTX2            | $F(3,8) = 23.5$ | 0.0003  | Yes    | Yes    | Yes    | No      | No      | No      |
| PAX6            | $F(3,8) = 51.7$ | <0.0001 | Yes    | Yes    | Yes    | No      | Yes     | No      |
| NEUROG2         | $F(3,8) = 134$  | <0.0001 | Yes    | Yes    | Yes    | Yes     | Yes     | No      |
| FABP7           | $F(3,8) = 19.6$ | 0.0005  | Yes    | Yes    | Yes    | No      | No      | No      |
| HES5            | $F(3,8) = 19.2$ | 0.0005  | Yes    | Yes    | Yes    | No      | No      | No      |
| ZIC1            | No test         | No test | *      | *      | *      | *       | *       | *       |
| CHAT            | $F(3,8) = 8.28$ | 0.0078  | No     | Yes    | Yes    | Yes     | No      | No      |
| GFAP            | $F(3,8) = 3.22$ | 0.0825  | No     | No     | No     | No      | No      | No      |
| NEUN            | $F(3,8) = 6.24$ | 0.6195  | No     | No     | No     | No      | No      | No      |
| GAD1            | $F(3,8) = 17.7$ | 0.0007  | Yes    | Yes    | Yes    | No      | No      | No      |
| MAP2            | $F(3,8) = 21.9$ | 0.0003  | Yes    | Yes    | Yes    | No      | No      | No      |
| NEUROD1         | $F(3,8) = 125$  | <0.0001 | Yes    | Yes    | Yes    | Yes     | Yes     | No      |

  

| <i>Cj</i> -iPSCs | F-statistic     | P-value | D0:D16 | D0:D30 | D0:D42 | D16:D30 | D16:D42 | D30:D42 |
|------------------|-----------------|---------|--------|--------|--------|---------|---------|---------|
| OCT4             | $F(3,8) = 4.78$ | 0.0341  | Yes    | No     | No     | No      | No      | No      |
| SOX2             | $F(3,8) = 1.02$ | 0.4349  | No     | No     | No     | No      | No      | No      |
| NANOG            | $F(3,8) = 18.6$ | 0.0006  | Yes    | Yes    | Yes    | No      | No      | No      |
| KLF4             | $F(3,8) = .831$ | 0.0006  | No     | No     | No     | No      | No      | No      |
| LIN28            | $F(3,8) = 11.3$ | 0.5135  | No     | No     | No     | Yes     | Yes     | No      |
| CMYC             | $F(3,8) = 5.13$ | 0.0287  | No     | Yes    | No     | No      | No      | No      |
| DMNT3B           | $F(3,8) = .471$ | 0.7112  | No     | No     | No     | No      | No      | No      |
| PODXL            | $F(3,8) = .602$ | 0.6317  | No     | No     | No     | No      | No      | No      |
| ZFP42            | $F(3,8) = 5.29$ | 0.0265  | No     | No     | Yes    | No      | No      | No      |
| PROM1            | $F(3,8) = 9.35$ | 0.0054  | No     | No     | Yes    | No      | Yes     | No      |
| DCX              | $F(3,8) = 172$  | <0.0001 | Yes    | Yes    | Yes    | Yes     | Yes     | No      |
| NESTIN           | $F(3,8) = 6.18$ | 0.0177  | Yes    | Yes    | No     | No      | No      | No      |
| OTX2             | $F(3,8) = 6.13$ | 0.0181  | No     | No     | No     | No      | Yes     | No      |
| PAX6             | $F(3,8) = 20.8$ | 0.0004  | Yes    | Yes    | Yes    | No      | No      | No      |
| NEUROG2          | $F(3,8) = 229$  | <0.0001 | Yes    | Yes    | Yes    | Yes     | Yes     | No      |
| FABP7            | $F(3,8) = 473$  | <0.0001 | Yes    | Yes    | Yes    | Yes     | Yes     | No      |
| HES5             | $F(3,8) = 1050$ | <0.0001 | Yes    | Yes    | Yes    | Yes     | No      | Yes     |
| ZIC1             | $F(3,7) = 104$  | <0.0001 | Yes    | Yes    | Yes    | Yes     | No      | No      |
| CHAT             | $F(3,8) = 35.0$ | <0.0001 | No     | Yes    | Yes    | Yes     | Yes     | No      |
| GFAP             | $F(3,8) = 8.36$ | 0.0076  | Yes    | No     | Yes    | No      | No      | No      |
| NEUN             | $F(3,8) = 69.8$ | <0.0001 | Yes    | Yes    | No     | Yes     | Yes     | Yes     |
| GAD1             | $F(3,8) = 160$  | <0.0001 | Yes    | Yes    | Yes    | Yes     | Yes     | No      |
| MAP2             | $F(3,8) = 22.3$ | 0.0003  | Yes    | Yes    | Yes    | No      | No      | No      |
| NEUROD1          | $F(3,8) = 92.9$ | <0.0001 | Yes    | Yes    | Yes    | Yes     | Yes     | No      |

  

| <i>Cj</i> -iPSCs | F-statistic      | P-value | D0:D4 | D0:D5 | D4:D5 |
|------------------|------------------|---------|-------|-------|-------|
| CXCR4            | $F(3,8) = 74.54$ | <0.0001 | Yes   | Yes   | No    |
| SOX17            | $F(3,8) = 261.6$ | <0.0001 | Yes   | Yes   | No    |
| FOXA2            | $F(3,8) = 42.92$ | 0.0003  | Yes   | Yes   | No    |

A significant difference ( $P < 0.05$ ) between time point comparisons is noted with a "yes."

\*ZIC1 was not statistically analyzed in the *Cj*-ESC line due to a lack of Ct detection in two of the three day 0 samples.
